# Supplementary material for: Glyphosate Residues in Groundwater, Drinking Water and Urine of Subsistence Farmers from Intensive Agriculture Localities: A Survey in Hopelchén, Campeche, Mexico
Source: PubMed Central journal article supplement (PMC5486281; doi:10.3390/ijerph14060595), 2017-06-03
Supplement: ijerph-14-00595-s001.pdf [file ijerph-14-00595-s001.pdf]

Table S1. Concentrations of glyphosate (ppb) in groundwater, drinking water and urine from Hopelchen, Campeche

| <b>Localities</b>           | <b>Groundwater<br/>Samples</b> | <b>ppb de glifosto</b> |
|-----------------------------|--------------------------------|------------------------|
| Ich-Ek (IE)                 | Groundwater                    | 1.4926                 |
| Ich-Ek (IE)                 | Groundwater                    | 1.3399                 |
| Ich-Ek (IE)                 | Groundwater                    | 1.5758                 |
| Ich-Ek (IE)                 | Groundwater                    | 1.5438                 |
| Ich-Ek (IE)                 | Groundwater                    | 0.9828                 |
| Ich-Ek (IE)                 | Groundwater                    | 1.1788                 |
| Ich-Ek (IE)                 | Groundwater                    | 1.4711                 |
| Ich-Ek (IE)                 | Groundwater                    | 1.7056                 |
| Bolonchén (Bol)             | Groundwater                    | 1.1115                 |
| Bolonchén (Bol)             | Groundwater                    | 1.1652                 |
| Pakchén (Pk)                | Groundwater                    | 1.0269                 |
| Pakchén (Pk)                | Groundwater                    | 1.0572                 |
| SJB Sacabchén (SJB-S)       | Groundwater                    | 1.0984                 |
| SJB Sacabchén (SJB-S)       | Groundwater                    | 1.2329                 |
| Cancabchén (Cab)            | Groundwater                    | 1.1039                 |
| Cancabchén (Cab)            | Groundwater                    | 0.9481                 |
| Xmaben (Xmb)                | Groundwater                    | 1.4132                 |
| Xmaben (Xmb)                | Groundwater                    | 1.1443                 |
| SF Suc-Tuc (SF-ST)          | Groundwater                    | 1.1914                 |
| SF Suc-Tuc (SF-ST)          | Groundwater                    | 1.3259                 |
| SF Suc-Tuc (SF-ST)          | Groundwater                    | N.D.                   |
| SF Suc-Tuc (SF-ST)          | Groundwater                    | N.D.                   |
| SF Suc-Tuc (SF-ST)          | Groundwater                    | N.D.                   |
| Campeche (Cmp (Ref))        | Groundwater                    | 0.6323                 |
| Campeche (Cmp (Ref))        | Groundwater                    | 0.1674                 |
| Campeche (Cmp (Ref))        | Groundwater                    | 0.7072                 |
| Campeche (Cmp (Ref))        | Groundwater                    | 0.2642                 |
| Campeche (Cmp (Ref))        | Groundwater                    | 0.2642                 |
| Campeche (Cmp (Ref))        | Groundwater                    | 0.2642                 |
| Positive control glyphosate |                                | 0.7288                 |
| Positive control glyphosate |                                | 0.7548                 |
| Positive control glyphosate |                                | 0.7464                 |

**Bottled drinking water**

| <b>Localities</b>           | <b>Samples</b>      | <b>ppb de glifosto</b> |
|-----------------------------|---------------------|------------------------|
| Bolonchén (Bol)             | Bottled drinking wa | 0.4736                 |
| Bolonchén (Bol)             | Bottled drinking wa | 0.5005                 |
| Hopelchén (Hp)              | Bottled drinking wa | 0.5161                 |
| Hopelchén (Hp)              | Bottled drinking wa | 0.5608                 |
| Hopelchén (Hp)              | Bottled drinking wa | 0.6943                 |
| Hopelchén (Hp)              | Bottled drinking wa | 0.4750                 |
| Hopelchén (Hp)              | Bottled drinking wa | 0.5781                 |
| Ich-Ek (IE)                 | Bottled drinking wa | 0.5173                 |
| Ich-Ek (IE)                 | Bottled drinking wa | 0.5343                 |
| Ich-Ek (IE)                 | Bottled drinking wa | 0.7883                 |
| Ich-Ek (IE)                 | Bottled drinking wa | 0.7608                 |
| Commercial                  | Bottled drinking wa | 0.3864                 |
| Commercial                  | Bottled drinking wa | 0.3221                 |
| Commercial                  | Bottled drinking wa | 0.0355                 |
| Commercial                  | Bottled drinking wa | N.D.                   |
| Positive control glyphosate |                     | 0.7612                 |
| Positive control glyphosate |                     | 0.7396                 |

**Urine**

| <b>Localities</b> | <b>Samples</b> | <b>ppb de glifosto</b> |
|-------------------|----------------|------------------------|
| Ich-Ek (IE)       | Urine          | 0.3716                 |
| Ich-Ek (IE)       | Urine          | 0.3122                 |
| Ich-Ek (IE)       | Urine          | 0.3266                 |
| Ich-Ek (IE)       | Urine          | 0.4220                 |
| Ich-Ek (IE)       | Urine          | 0.4344                 |
| Ich-Ek (IE)       | Urine          | 0.8429                 |
| Ich-Ek (IE)       | Urine          | 0.5105                 |
| Ich-Ek (IE)       | Urine          | 0.3422                 |
| Ich-Ek (IE)       | Urine          | 0.3655                 |
| Ich-Ek (IE)       | Urine          | 0.4020                 |
| Ich-Ek (IE)       | Urine          | 0.4544                 |
| Ich-Ek (IE)       | Urine          | N.D.                   |

|                           |       |        |
|---------------------------|-------|--------|
| Ich-Ek (IE)               | Urine | N.D.   |
| Ich-Ek (IE)               | Urine | N.D.   |
| Ich-Ek (IE)               | Urine | N.D.   |
| Ich-Ek (IE)               | Urine | N.D.   |
| Francisco J. Mújica (FJM) | Urine | 0.2543 |
| Francisco J. Mújica (FJM) | Urine | 0.3836 |
| Francisco J. Mújica (FJM) | Urine | 0.3084 |
| Francisco J. Mújica (FJM) | Urine | 0.3219 |
| Francisco J. Mújica (FJM) | Urine | 0.3021 |
| Francisco J. Mújica (FJM) | Urine | 0.5566 |
| Francisco J. Mújica (FJM) | Urine | 0.5948 |
| Francisco J. Mújica (FJM) | Urine | 0.5037 |
| Francisco J. Mújica (FJM) | Urine | 0.8754 |
| Francisco J. Mújica (FJM) | Urine | 0.4940 |
| Francisco J. Mújica (FJM) | Urine | 0.3447 |
| Francisco J. Mújica (FJM) | Urine | 0.3786 |
| Francisco J. Mújica (FJM) | Urine | 0.7959 |
| Francisco J. Mújica (FJM) | Urine | N.D.   |
| Francisco J. Mújica (FJM) | Urine | N.D.   |
| SF Suc-Tuc (SF-ST)        | Urine | 0.3298 |
| SF Suc-Tuc (SF-ST)        | Urine | 0.4793 |
| SF Suc-Tuc (SF-ST)        | Urine | 0.4141 |
| SF Suc-Tuc (SF-ST)        | Urine | 0.3133 |
| SF Suc-Tuc (SF-ST)        | Urine | 0.2444 |
| SF Suc-Tuc (SF-ST)        | Urine | N.D.   |
| SF Suc-Tuc (SF-ST)        | Urine | N.D.   |
| SF Suc-Tuc (SF-ST)        | Urine | N.D.   |
| SF Suc-Tuc (SF-ST)        | Urine | N.D.   |
| SF Suc-Tuc (SF-ST)        | Urine | N.D.   |
| SF Suc-Tuc (SF-ST)        | Urine | N.D.   |
| SF Suc-Tuc (SF-ST)        | Urine | N.D.   |
| SF Suc-Tuc (SF-ST)        | Urine | N.D.   |
| SF Suc-Tuc (SF-ST)        | Urine | N.D.   |
| SF Suc-Tuc (SF-ST)        | Urine | N.D.   |
| SJB Sacabchén (SJB-S)     | Urine | 0.6884 |
| SJB Sacabchén (SJB-S)     | Urine | 0.2427 |
| SJB Sacabchén (SJB-S)     | Urine | 0.3076 |
| SJB Sacabchén (SJB-S)     | Urine | 0.1046 |
| SJB Sacabchén (SJB-S)     | Urine | 0.1312 |
| SJB Sacabchén (SJB-S)     | Urine | 0.4972 |
| SJB Sacabchén (SJB-S)     | Urine | 0.1023 |
| SJB Sacabchén (SJB-S)     | Urine | 0.2652 |

|                             |       |        |
|-----------------------------|-------|--------|
| SJB Sacabchén (SJB-S)       | Urine | 0.4131 |
| SJB Sacabchén (SJB-S)       | Urine | 0.3078 |
| SJB Sacabchén (SJB-S)       | Urine | 0.0641 |
| SJB Sacabchén (SJB-S)       | Urine | 0.2875 |
| SJB Sacabchén (SJB-S)       | Urine | 0.5968 |
| SJB Sacabchén (SJB-S)       | Urine | N.D.   |
| SJB Sacabchén (SJB-S)       | Urine | N.D.   |
| Crucero San Luis (CSL)      | Urine | 0.2585 |
| Crucero San Luis (CSL)      | Urine | 0.1464 |
| Crucero San Luis (CSL)      | Urine | 0.3004 |
| Crucero San Luis (CSL)      | Urine | 0.2193 |
| Crucero San Luis (CSL)      | Urine | 0.2753 |
| Crucero San Luis (CSL)      | Urine | 0.4707 |
| Crucero San Luis (CSL)      | Urine | 0.1754 |
| Crucero San Luis (CSL)      | Urine | 0.4105 |
| Crucero San Luis (CSL)      | Urine | 0.1529 |
| Crucero San Luis (CSL)      | Urine | 0.4905 |
| Crucero San Luis (CSL)      | Urine | N.D.   |
| Crucero San Luis (CSL)      | Urine | N.D.   |
| Crucero San Luis (CSL)      | Urine | N.D.   |
| Crucero San Luis (CSL)      | Urine | N.D.   |
| Crucero San Luis (CSL)      | Urine | N.D.   |
| fishermen                   | Urine | 0.2058 |
| fishermen                   | Urine | 0.1935 |
| fishermen                   | Urine | 0.2370 |
| fishermen                   | Urine | 0.2538 |
| fishermen                   | Urine | 0.1814 |
| fishermen                   | Urine | 0.2015 |
| fishermen                   | Urine | N.D.   |
| fishermen                   | Urine | N.D.   |
| Positive control glyphosate |       | 0.7283 |
| Positive control glyphosate |       | 0.7597 |
